# Supplementary material for: Low Amplitude Boom-and-Bust Cycles Define the Septoria Nodorum Blotch Interaction
Source: Front Plant Sci. 2020 Jan 31;10:1785. doi: 10.3389/fpls.2019.01785 (PMC7005668; doi:10.3389/fpls.2019.01785)
Supplement: Supplementary file 8 [file Table_4.xlsx]

## Sheet: Description
Table S4. Variances for PC 1 to 149.

## Sheet: TABLE S4
	eigen_value	variance_explained
1	1.47327	7.39093
2	1.31481	6.59598
3	0.969357	4.86295
4	0.920743	4.61906
5	0.664141	3.33178
6	0.559285	2.80575
7	0.53815	2.69972
8	0.49432	2.47984
9	0.461166	2.31352
10	0.444223	2.22852
11	0.387802	1.94547
12	0.383436	1.92357
13	0.374938	1.88094
14	0.349228	1.75196
15	0.341635	1.71387
16	0.336542	1.68832
17	0.319026	1.60045
18	0.309337	1.55184
19	0.299677	1.50338
20	0.279873	1.40403
21	0.264592	1.32737
22	0.260231	1.30549
23	0.243936	1.22375
24	0.232843	1.1681
25	0.223051	1.11897
26	0.214532	1.07624
27	0.209054	1.04876
28	0.197654	0.991564
29	0.192411	0.965264
30	0.186525	0.935734
31	0.182679	0.916442
32	0.178036	0.893148
33	0.17044	0.855044
34	0.167914	0.842371
35	0.161868	0.812039
36	0.158361	0.794448
37	0.151148	0.758262
38	0.148285	0.743895
39	0.14629	0.733888
40	0.139563	0.700143
41	0.135966	0.682098
42	0.132335	0.663881
43	0.129528	0.649802
44	0.127137	0.637807
45	0.122146	0.612765
46	0.118443	0.59419
47	0.116804	0.585966
48	0.113995	0.571873
49	0.110975	0.556725
50	0.108601	0.544816
51	0.106632	0.534938
52	0.103314	0.518293
53	0.100999	0.50668
54	0.0989231	0.496265
55	0.0978882	0.491073
56	0.0959527	0.481364
57	0.0912033	0.457537
58	0.0886988	0.444973
59	0.0851668	0.427254
60	0.0833926	0.418354
61	0.0829875	0.416321
62	0.0813217	0.407964
63	0.077563	0.389108
64	0.076531	0.383931
65	0.0751633	0.37707
66	0.0735438	0.368945
67	0.0707242	0.3548
68	0.0692156	0.347232
69	0.0661066	0.331635
70	0.0647932	0.325046
71	0.0642566	0.322355
72	0.0630612	0.316357
73	0.0614173	0.308111
74	0.0605954	0.303987
75	0.0591041	0.296506
76	0.0573364	0.287638
77	0.0565158	0.283521
78	0.0559704	0.280785
79	0.0545535	0.273677
80	0.0515972	0.258846
81	0.0499143	0.250404
82	0.0487178	0.244401
83	0.047435	0.237966
84	0.0464018	0.232783
85	0.0450098	0.225799
86	0.0441353	0.221412
87	0.0428748	0.215089
88	0.0421459	0.211432
89	0.0411951	0.206662
90	0.0396452	0.198887
91	0.0389676	0.195487
92	0.0379346	0.190306
93	0.0371869	0.186555
94	0.0364689	0.182953
95	0.0360259	0.18073
96	0.0345937	0.173545
97	0.0326688	0.163888
98	0.0315149	0.1581
99	0.0314836	0.157943
100	0.0294387	0.147685
101	0.0290118	0.145543
102	0.0280622	0.140779
103	0.0273204	0.137058
104	0.0268912	0.134904
105	0.0252523	0.126682
106	0.025131	0.126074
107	0.0248157	0.124492
108	0.0233837	0.117308
109	0.0232753	0.116765
110	0.0223679	0.112212
111	0.0211317	0.106011
112	0.0202386	0.10153
113	0.0189226	0.0949284
114	0.0179054	0.0898255
115	0.0173524	0.0870512
116	0.0163989	0.0822678
117	0.0150358	0.0754298
118	0.0144736	0.0726094
119	0.013868	0.0695715
120	0.0131551	0.0659949
121	0.0128135	0.0642811
122	0.0125728	0.0630734
123	0.0122463	0.0614356
124	0.0111222	0.0557965
125	0.0104933	0.0526415
126	0.0100251	0.0502925
127	0.00993874	0.0498594
128	0.00939852	0.0471493
129	0.00915766	0.045941
130	0.00880544	0.044174
131	0.00788855	0.0395743
132	0.00714331	0.0358357
133	0.00634	0.0318057
134	0.00608818	0.0305424
135	0.00562574	0.0282225
136	0.00537494	0.0269643
137	0.00467133	0.0234345
138	0.00420567	0.0210985
139	0.00395098	0.0198208
140	0.00380235	0.0190751
141	0.00265936	0.0133411
142	0.00249168	0.0125
143	0.00226801	0.0113778
144	0.00197205	0.00989313
145	0.00120466	0.00604341
146	0.00117432	0.0058912
147	0.000841559	0.00422183
148	0.000499231	0.00250448
149	0.000168405	0.000844831
