# Supplementary material for: Low Amplitude Boom-and-Bust Cycles Define the Septoria Nodorum Blotch Interaction
Source: Front Plant Sci. 2020 Jan 31;10:1785. doi: 10.3389/fpls.2019.01785 (PMC7005668; doi:10.3389/fpls.2019.01785)
Supplement: Supplementary file 9 [file Table_5.xlsx]

## Sheet: Description
Table S5. Disease assay of three isolates from each of five Australian groups on seven wheat cultivars which were top grown in WA during three eras (Era I: 1984-2001, II: 2001-2013 and III: 2013-present).

## Sheet: TABLE S6
WPS of P. nodorum 15 isolates of 5 Australian sub-groups on 7 wheat lines
No	group	treatment	era	wheatline	reps	SNB_1stleaf
1	1	FG63	1	Cadoux	a	5
2	1	FG63	1	Cadoux	b	4
3	1	FG63	1	Cadoux	c	5
4	1	MuS3	1	Cadoux	a	7
5	1	MuS3	1	Cadoux	b	8
6	1	MuS3	1	Cadoux	c	8
7	1	FG49	1	Cadoux	a	7
8	1	FG49	1	Cadoux	b	8
9	1	FG49	1	Cadoux	c	7.5
10	2	WAC13443	1	Cadoux	a	6
11	2	WAC13443	1	Cadoux	b	7
12	2	WAC13443	1	Cadoux	c	7
13	2	Meck1	1	Cadoux	a	7.5
14	2	Meck1	1	Cadoux	b	8
15	2	Meck1	1	Cadoux	c	7
16	2	WAC13077	1	Cadoux	a	5.5
17	2	WAC13077	1	Cadoux	b	3
18	2	WAC13077	1	Cadoux	c	6
19	3	WAC8635	1	Cadoux	a	8
20	3	WAC8635	1	Cadoux	b	7.5
21	3	WAC8635	1	Cadoux	c	7
22	3	WAC13418	1	Cadoux	a	8
23	3	WAC13418	1	Cadoux	b	8
24	3	WAC13418	1	Cadoux	c	7.5
25	3	Sn15	1	Cadoux	a	7
26	3	Sn15	1	Cadoux	b	7
27	3	Sn15	1	Cadoux	c	6
28	4	WAC13404	1	Cadoux	a	6
29	4	WAC13404	1	Cadoux	b	7
30	4	WAC13404	1	Cadoux	c	7
31	4	WAC13632	1	Cadoux	a	6.5
32	4	WAC13632	1	Cadoux	b	7.5
33	4	WAC13632	1	Cadoux	c	7.5
34	4	WAC13075	1	Cadoux	a	7
35	4	WAC13075	1	Cadoux	b	7
36	4	WAC13075	1	Cadoux	c	8
37	5	16FG167	1	Cadoux	a	8
38	5	16FG167	1	Cadoux	b	7.5
39	5	16FG167	1	Cadoux	c	7.5
40	5	16FG168	1	Cadoux	a	7.5
41	5	16FG168	1	Cadoux	b	7.5
42	5	16FG168	1	Cadoux	c	7.5
43	5	16FG165	1	Cadoux	a	7
44	5	16FG165	1	Cadoux	b	7.5
45	5	16FG165	1	Cadoux	c	7
46		control	1	Cadoux	a	4
47		control	1	Cadoux	b	4
48		control	1	Cadoux	c	3
49	1	FG63	2	Calingiri	a	5
50	1	FG63	2	Calingiri	b	7
51	1	FG63	2	Calingiri	c	7
52	1	MuS3	2	Calingiri	a	8
53	1	MuS3	2	Calingiri	b	7.5
54	1	MuS3	2	Calingiri	c	7.5
55	1	FG49	2	Calingiri	a	7.5
56	1	FG49	2	Calingiri	b	7
57	1	FG49	2	Calingiri	c	7.5
58	2	WAC13443	2	Calingiri	a	7
59	2	WAC13443	2	Calingiri	b	7
60	2	WAC13443	2	Calingiri	c	7
61	2	Meck1	2	Calingiri	a	6
62	2	Meck1	2	Calingiri	b	6
63	2	Meck1	2	Calingiri	c	6
64	2	WAC13077	2	Calingiri	a	5
65	2	WAC13077	2	Calingiri	b	4
66	2	WAC13077	2	Calingiri	c	4
67	3	WAC8635	2	Calingiri	a	7
68	3	WAC8635	2	Calingiri	b	7
69	3	WAC8635	2	Calingiri	c	7
70	3	WAC13418	2	Calingiri	a	8
71	3	WAC13418	2	Calingiri	b	7.5
72	3	WAC13418	2	Calingiri	c	8
73	3	Sn15	2	Calingiri	a	6
74	3	Sn15	2	Calingiri	b	5
75	3	Sn15	2	Calingiri	c	6
76	4	WAC13404	2	Calingiri	a	7
77	4	WAC13404	2	Calingiri	b	7
78	4	WAC13404	2	Calingiri	c	7
79	4	WAC13632	2	Calingiri	a	7
80	4	WAC13632	2	Calingiri	b	6
81	4	WAC13632	2	Calingiri	c	6
82	4	WAC13075	2	Calingiri	a	7
83	4	WAC13075	2	Calingiri	b	7
84	4	WAC13075	2	Calingiri	c	5
85	5	16FG167	2	Calingiri	a	7
86	5	16FG167	2	Calingiri	b	7.5
87	5	16FG167	2	Calingiri	c	7
88	5	16FG168	2	Calingiri	a	7.5
89	5	16FG168	2	Calingiri	b	8
90	5	16FG168	2	Calingiri	c	8
91	5	16FG165	2	Calingiri	a	7.5
92	5	16FG165	2	Calingiri	b	7.5
93	5	16FG165	2	Calingiri	c	7.5
94		control	2	Calingiri	a	0
95		control	2	Calingiri	b	0
96		control	2	Calingiri	c	0
97	1	FG63	2	Carnamah	a	7
98	1	FG63	2	Carnamah	b	6
99	1	FG63	2	Carnamah	c	7
100	1	MuS3	2	Carnamah	a	8
101	1	MuS3	2	Carnamah	b	8
102	1	MuS3	2	Carnamah	c	7.5
103	1	FG49	2	Carnamah	a	8
104	1	FG49	2	Carnamah	b	7.5
105	1	FG49	2	Carnamah	c	7.5
106	2	WAC13443	2	Carnamah	a	7
107	2	WAC13443	2	Carnamah	b	7
108	2	WAC13443	2	Carnamah	c	7
109	2	Meck1	2	Carnamah	a	7.5
110	2	Meck1	2	Carnamah	b	7.5
111	2	Meck1	2	Carnamah	c	7
112	2	WAC13077	2	Carnamah	a	5.5
113	2	WAC13077	2	Carnamah	b	4
114	2	WAC13077	2	Carnamah	c	2
115	3	WAC8635	2	Carnamah	a	5.5
116	3	WAC8635	2	Carnamah	b	6
117	3	WAC8635	2	Carnamah	c	6
118	3	WAC13418	2	Carnamah	a	8
119	3	WAC13418	2	Carnamah	b	7.5
120	3	WAC13418	2	Carnamah	c	8
121	3	Sn15	2	Carnamah	a	5
122	3	Sn15	2	Carnamah	b	6
123	3	Sn15	2	Carnamah	c	7
124	4	WAC13404	2	Carnamah	a	7
125	4	WAC13404	2	Carnamah	b	7.5
126	4	WAC13404	2	Carnamah	c	4.5
127	4	WAC13632	2	Carnamah	a	7
128	4	WAC13632	2	Carnamah	b	6
129	4	WAC13632	2	Carnamah	c	7
130	4	WAC13075	2	Carnamah	a	7
131	4	WAC13075	2	Carnamah	b	6
132	4	WAC13075	2	Carnamah	c	7
133	5	16FG167	2	Carnamah	a	7
134	5	16FG167	2	Carnamah	b	8.5
135	5	16FG167	2	Carnamah	c	7.5
136	5	16FG168	2	Carnamah	a	7
137	5	16FG168	2	Carnamah	b	7.5
138	5	16FG168	2	Carnamah	c	7.5
139	5	16FG165	2	Carnamah	a	7.5
140	5	16FG165	2	Carnamah	b	8
141	5	16FG165	2	Carnamah	c	7.5
142		control	2	Carnamah	a	2
143		control	2	Carnamah	b	3
144		control	2	Carnamah	c	1
145	1	FG63	1	Eradu	a	4
146	1	FG63	1	Eradu	b	4
147	1	FG63	1	Eradu	c	5
148	1	MuS3	1	Eradu	a	8
149	1	MuS3	1	Eradu	b	8
150	1	MuS3	1	Eradu	c	7
151	1	FG49	1	Eradu	a	8
152	1	FG49	1	Eradu	b	8
153	1	FG49	1	Eradu	c	7.5
154	2	WAC13443	1	Eradu	a	4
155	2	WAC13443	1	Eradu	b	7
156	2	WAC13443	1	Eradu	c	7
157	2	Meck1	1	Eradu	a	7.5
158	2	Meck1	1	Eradu	b	7
159	2	Meck1	1	Eradu	c	7
160	2	WAC13077	1	Eradu	a	2
161	2	WAC13077	1	Eradu	b	4
162	2	WAC13077	1	Eradu	c	3
163	3	WAC8635	1	Eradu	a	7
164	3	WAC8635	1	Eradu	b	5
165	3	WAC8635	1	Eradu	c	7
166	3	WAC13418	1	Eradu	a	7
167	3	WAC13418	1	Eradu	b	7
168	3	WAC13418	1	Eradu	c	7
169	3	Sn15	1	Eradu	a	6
170	3	Sn15	1	Eradu	b	6
171	3	Sn15	1	Eradu	c	7
172	4	WAC13404	1	Eradu	a	7
173	4	WAC13404	1	Eradu	b	6.5
174	4	WAC13404	1	Eradu	c	6
175	4	WAC13632	1	Eradu	a	7
176	4	WAC13632	1	Eradu	b	6
177	4	WAC13632	1	Eradu	c	7
178	4	WAC13075	1	Eradu	a	4
179	4	WAC13075	1	Eradu	b	6
180	4	WAC13075	1	Eradu	c	7
181	5	16FG167	1	Eradu	a	7
182	5	16FG167	1	Eradu	b	8
183	5	16FG167	1	Eradu	c	7.5
184	5	16FG168	1	Eradu	a	7
185	5	16FG168	1	Eradu	b	7
186	5	16FG168	1	Eradu	c	7.5
187	5	16FG165	1	Eradu	a	7
188	5	16FG165	1	Eradu	b	7.5
189	5	16FG165	1	Eradu	c	7
190		control	1	Eradu	a	4
191		control	1	Eradu	b	2
192		control	1	Eradu	c	2
193	1	FG63	1	Halberd	a	7.5
194	1	FG63	1	Halberd	b	7
195	1	FG63	1	Halberd	c	7
196	1	MuS3	1	Halberd	a	8
197	1	MuS3	1	Halberd	b	8.5
198	1	MuS3	1	Halberd	c	8.5
199	1	FG49	1	Halberd	a	8
200	1	FG49	1	Halberd	b	9
201	1	FG49	1	Halberd	c	9
202	2	WAC13443	1	Halberd	a	6.5
203	2	WAC13443	1	Halberd	b	7
204	2	WAC13443	1	Halberd	c	7
205	2	Meck1	1	Halberd	a	7.5
206	2	Meck1	1	Halberd	b	9
207	2	Meck1	1	Halberd	c	8
208	2	WAC13077	1	Halberd	a	6.5
209	2	WAC13077	1	Halberd	b	7
210	2	WAC13077	1	Halberd	c	7
211	3	WAC8635	1	Halberd	a	7
212	3	WAC8635	1	Halberd	b	8
213	3	WAC8635	1	Halberd	c	8
214	3	WAC13418	1	Halberd	a	9
215	3	WAC13418	1	Halberd	b	8.5
216	3	WAC13418	1	Halberd	c	9
217	3	Sn15	1	Halberd	a	8
218	3	Sn15	1	Halberd	b	8
219	3	Sn15	1	Halberd	c	8
220	4	WAC13404	1	Halberd	a	7.5
221	4	WAC13404	1	Halberd	b	7.5
222	4	WAC13404	1	Halberd	c	8
223	4	WAC13632	1	Halberd	a	7.5
224	4	WAC13632	1	Halberd	b	7
225	4	WAC13632	1	Halberd	c	7.5
226	4	WAC13075	1	Halberd	a	8
227	4	WAC13075	1	Halberd	b	8
228	4	WAC13075	1	Halberd	c	8
229	5	16FG167	1	Halberd	a	7
230	5	16FG167	1	Halberd	b	8.5
231	5	16FG167	1	Halberd	c	8.5
232	5	16FG168	1	Halberd	a	8
233	5	16FG168	1	Halberd	b	8
234	5	16FG168	1	Halberd	c	7
235	5	16FG165	1	Halberd	a	8.5
236	5	16FG165	1	Halberd	b	8.5
237	5	16FG165	1	Halberd	c	8.5
238		control	1	Halberd	a	0
239		control	1	Halberd	b	0
240		control	1	Halberd	c	0
241	1	FG63	3	Mace	a	3
242	1	FG63	3	Mace	b	5
243	1	FG63	3	Mace	c	3
244	1	MuS3	3	Mace	a	6
245	1	MuS3	3	Mace	b	6
246	1	MuS3	3	Mace	c	7
247	1	FG49	3	Mace	a	7
248	1	FG49	3	Mace	b	7
249	1	FG49	3	Mace	c	7
250	2	WAC13443	3	Mace	a	3.5
251	2	WAC13443	3	Mace	b	4
252	2	WAC13443	3	Mace	c	3
253	2	Meck1	3	Mace	a	4.5
254	2	Meck1	3	Mace	b	6.5
255	2	Meck1	3	Mace	c	3
256	2	WAC13077	3	Mace	a	na
257	2	WAC13077	3	Mace	b	2
258	2	WAC13077	3	Mace	c	2
259	3	WAC8635	3	Mace	a	6
260	3	WAC8635	3	Mace	b	4
261	3	WAC8635	3	Mace	c	4.5
262	3	WAC13418	3	Mace	a	7.5
263	3	WAC13418	3	Mace	b	6.5
264	3	WAC13418	3	Mace	c	7
265	3	Sn15	3	Mace	a	4
266	3	Sn15	3	Mace	b	2
267	3	Sn15	3	Mace	c	2
268	4	WAC13404	3	Mace	a	4.5
269	4	WAC13404	3	Mace	b	5
270	4	WAC13404	3	Mace	c	5.5
271	4	WAC13632	3	Mace	a	3
272	4	WAC13632	3	Mace	b	2.5
273	4	WAC13632	3	Mace	c	3
274	4	WAC13075	3	Mace	a	3
275	4	WAC13075	3	Mace	b	2
276	4	WAC13075	3	Mace	c	3.5
277	5	16FG167	3	Mace	a	7
278	5	16FG167	3	Mace	b	6
279	5	16FG167	3	Mace	c	7
280	5	16FG168	3	Mace	a	7
281	5	16FG168	3	Mace	b	6
282	5	16FG168	3	Mace	c	6
283	5	16FG165	3	Mace	a	3
284	5	16FG165	3	Mace	b	7
285	5	16FG165	3	Mace	c	6
286		control	3	Mace	a	0
287		control	3	Mace	b	0
288		control	3	Mace	c	0
289	1	FG63	2	Wyalkatchem	a	2
290	1	FG63	2	Wyalkatchem	b	3
291	1	FG63	2	Wyalkatchem	c	3
292	1	MuS3	2	Wyalkatchem	a	8
293	1	MuS3	2	Wyalkatchem	b	7.5
294	1	MuS3	2	Wyalkatchem	c	6
295	1	FG49	2	Wyalkatchem	a	8
296	1	FG49	2	Wyalkatchem	b	7
297	1	FG49	2	Wyalkatchem	c	6.5
298	2	WAC13443	2	Wyalkatchem	a	4.5
299	2	WAC13443	2	Wyalkatchem	b	5
300	2	WAC13443	2	Wyalkatchem	c	4.5
301	2	Meck1	2	Wyalkatchem	a	7
302	2	Meck1	2	Wyalkatchem	b	7
303	2	Meck1	2	Wyalkatchem	c	7.5
304	2	WAC13077	2	Wyalkatchem	a	2
305	2	WAC13077	2	Wyalkatchem	b	3
306	2	WAC13077	2	Wyalkatchem	c	2
307	3	WAC8635	2	Wyalkatchem	a	7
308	3	WAC8635	2	Wyalkatchem	b	6
309	3	WAC8635	2	Wyalkatchem	c	5
310	3	WAC13418	2	Wyalkatchem	a	6.5
311	3	WAC13418	2	Wyalkatchem	b	6
312	3	WAC13418	2	Wyalkatchem	c	7.5
313	3	Sn15	2	Wyalkatchem	a	4.5
314	3	Sn15	2	Wyalkatchem	b	4
315	3	Sn15	2	Wyalkatchem	c	4
316	4	WAC13404	2	Wyalkatchem	a	7
317	4	WAC13404	2	Wyalkatchem	b	5
318	4	WAC13404	2	Wyalkatchem	c	7
319	4	WAC13632	2	Wyalkatchem	a	5
320	4	WAC13632	2	Wyalkatchem	b	5.5
321	4	WAC13632	2	Wyalkatchem	c	4
322	4	WAC13075	2	Wyalkatchem	a	5
323	4	WAC13075	2	Wyalkatchem	b	5
324	4	WAC13075	2	Wyalkatchem	c	5
325	5	16FG167	2	Wyalkatchem	a	7
326	5	16FG167	2	Wyalkatchem	b	7
327	5	16FG167	2	Wyalkatchem	c	7
328	5	16FG168	2	Wyalkatchem	a	4
329	5	16FG168	2	Wyalkatchem	b	7
330	5	16FG168	2	Wyalkatchem	c	6.5
331	5	16FG165	2	Wyalkatchem	a	7
332	5	16FG165	2	Wyalkatchem	b	7
333	5	16FG165	2	Wyalkatchem	c	7
334		control	2	Wyalkatchem	a	0
335		control	2	Wyalkatchem	b	0
336		control	2	Wyalkatchem	c	0
